# Supplementary material
Source: HighWire-hosted journal article supplement (https://qualitysafety.bmj.com/highwire/filestream/147415/field_highwire_adjunct_files/1/Resident_Oral_Sign_Evaluation.pdf)
Supplement: Resident_Oral_Sign_Evaluation.pdf [file Resident_Oral_Sign_Evaluation.pdf]

## Resident Oral Sign-Out Evaluation

Date \_\_\_\_/\_\_\_\_/\_\_\_\_ Time \_\_\_\_\_ Location \_\_\_\_\_

Completed by (name/service): \_\_\_\_\_

Evaluation of (name/service): \_\_\_\_\_

|                                                                                    | <i>Please choose the appropriate box</i> |    |    |
|------------------------------------------------------------------------------------|------------------------------------------|----|----|
| <b><u>VERBAL HANDOFF</u></b>                                                       | YES                                      | NO | NA |
| The sign-out is face to face?                                                      |                                          |    |    |
| The sign-out took place in a setting free of interruptions and distracting noises? |                                          |    |    |
| Use of concise, concrete, closed-loop language?                                    |                                          |    |    |
| Code status is mentioned if the patient is not full code?                          |                                          |    |    |
| Highlights sickest patients?                                                       |                                          |    |    |
| Specifies the clinical condition of each patient?                                  |                                          |    |    |
| Includes general hospital course?                                                  |                                          |    |    |
| Specifies relevant new events?                                                     |                                          |    |    |
| Includes up-to-date task list?                                                     |                                          |    |    |
| Anticipatory guidance and rationale provided?                                      |                                          |    |    |
| Provides opportunity for read-back and questions?                                  |                                          |    |    |
| Is there an accompanying written signout?                                          |                                          |    |    |
|                                                                                    |                                          |    |    |
| <b><u>RECEIVER</u></b>                                                             |                                          |    |    |
| Did the receiver take notes?                                                       |                                          |    |    |
| Did the receiver ask questions?                                                    |                                          |    |    |
| Did the receiver confirm understanding?                                            |                                          |    |    |
